# Supplementary figures and images for: TEM-compatible microdevice for the complete thermoelectric characterization of epitaxially integrated Si-based nanowires
Source: Royal Society of Chemistry journal article supplement (doi:10.1039/d4nh00114a), 2024-01-01

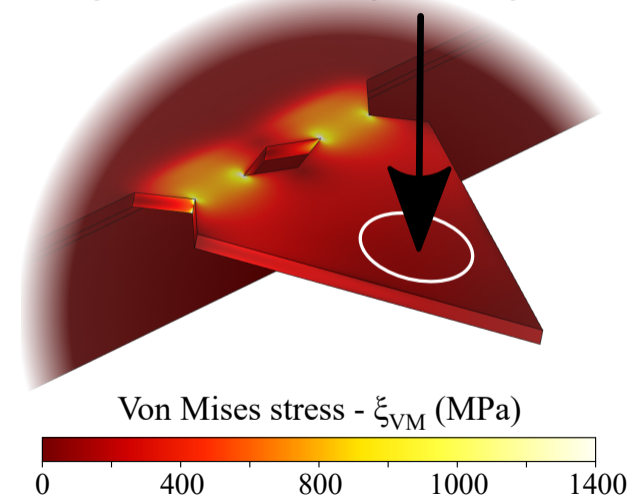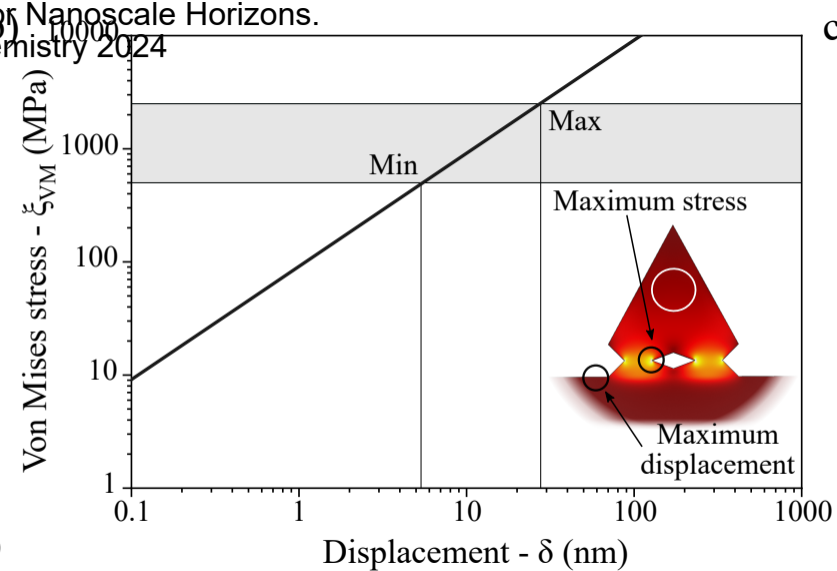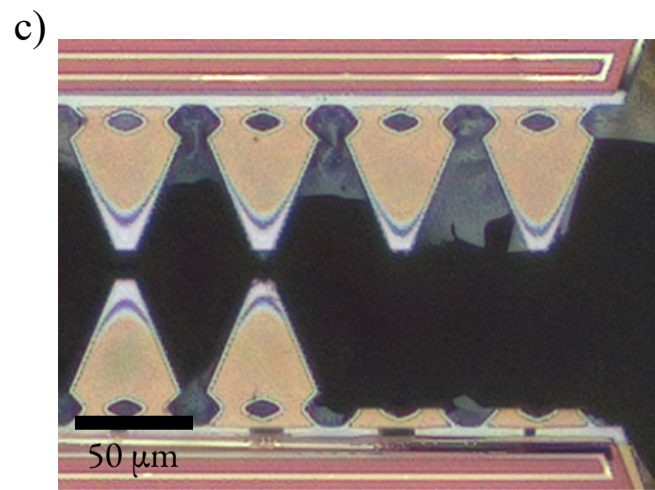

Supplement: d4nh00114a1.pdf [file d4nh00114a1.pdf]

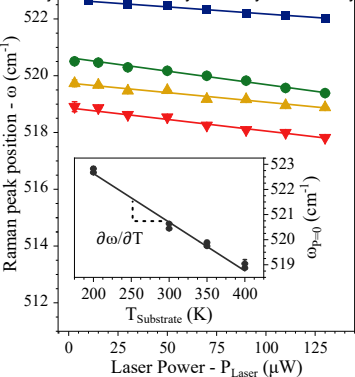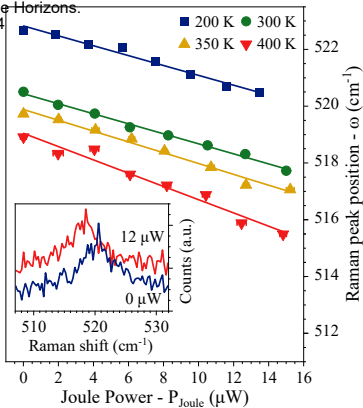

Supplement: d4nh00114a2.pdf [file d4nh00114a2.pdf]
